# Supplementary material
Source: PubMed Central journal article supplement (PMC9906069)
Supplement: ajcr0013-0293-f9.pdf [file ajcr0013-0293-f9.pdf]

# MiR-181a-5p inhibits uveal melanoma development

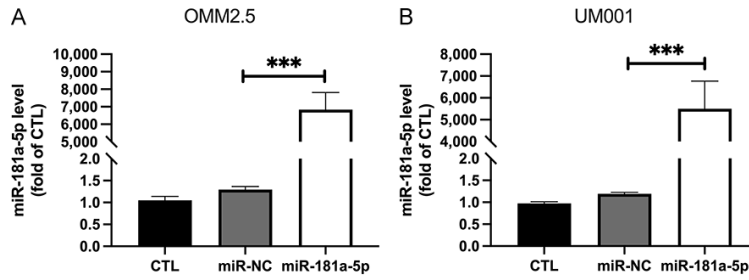

**Figure S1.** Level of miR-181a-5p in UM cell after transfection. Quantitative RT-PCR was performed to detect miR-181a-5p level in OMM2.5 (A) and UM001 (B) cells after transfected with 25 nM of miR-181a-5p. The relative miR-181a-5p levels are presented respectively. \*\*\* $P < 0.001$  vs. miR-NC.

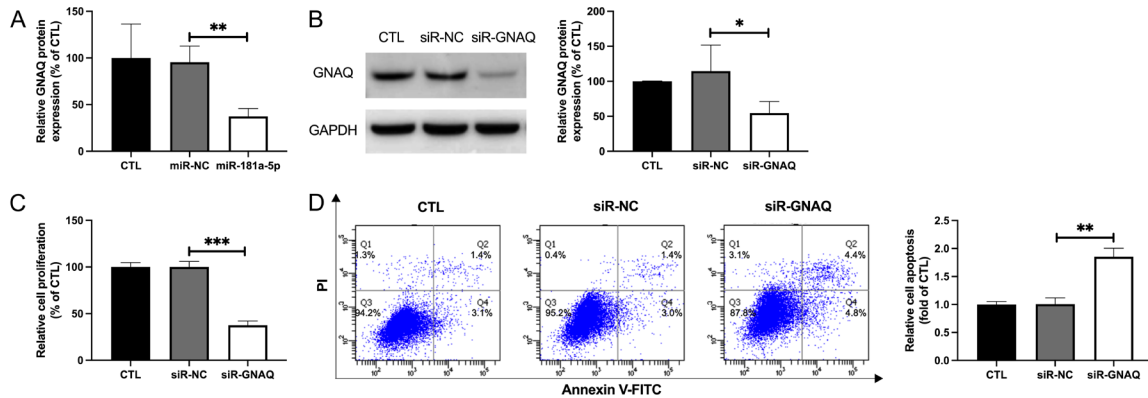

**Figure S2.** GNAQ silencing reduced cell proliferation and increased apoptosis of OMM2.5 cells. (A) Western blotting analysis of GNAQ protein in miRNA transfected OMM2.5 cells after treatment with 25 nM miR-181a-5p for 48 h using  $\beta$ -actin as loading control. \*\* $P < 0.01$  vs. miR-NC. (B) Western blot analysis of OMM2.5 cells transfected with siR-GNAQ or siR-NC for 48 h (left), and corresponding quantification shown as percentage of CTL (right). Cell proliferation (C) and cell apoptosis (D) were assessed and normalized to CTL. \* $P < 0.05$ , \*\* $P < 0.01$ , \*\*\* $P < 0.001$  vs. siR-NC.

## MiR-181a-5p inhibits uveal melanoma development

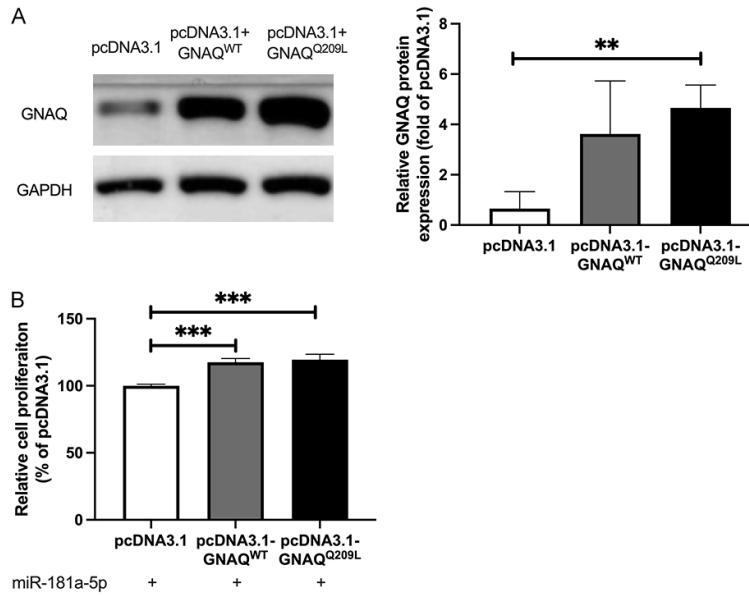

**Figure S3.** GNAQ overexpression reversed the effects of miR-181a on UM cells. (A) Overexpression plasmids of GNAQ wild type (GNAQ<sup>WT</sup>) and GNAQ Q209L mutation (GNAQ<sup>Q209L</sup>) were transfected into OMM2.5 cells for 48 h, and their protein levels were determined.  $***P < 0.001$  vs. pcDNA3.1. (B) Cell proliferation of OMM2.5 cells was assessed after co-transfection with GNAQ overexpression plasmids and miR-181a-5p, values are normalized to miR-181a+pcDNA3.1 group.  $**P < 0.01$ ,  $***P < 0.001$  vs. miR-181a-5p+pcDNA3.1.

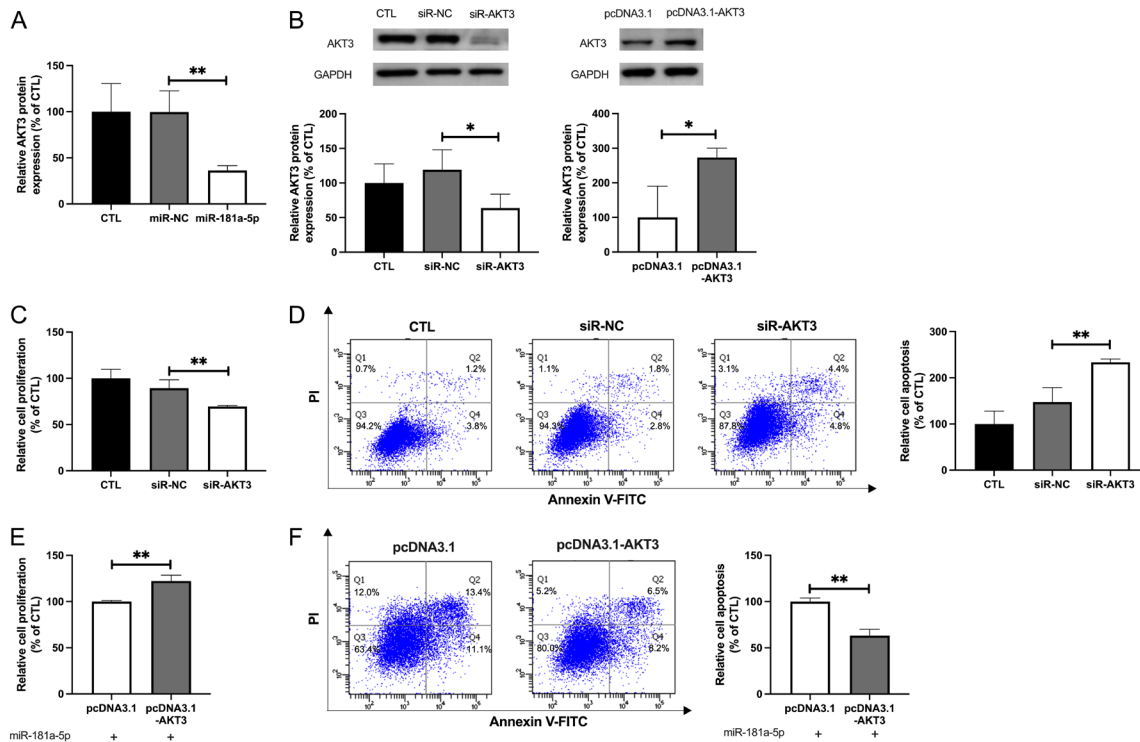

**Figure S4.** Regulation of Akt3 expression altered cell proliferation and apoptosis of OMM2.5 cells. (A) Western blotting analysis of AKT3 protein levels in OMM2.5 cells with or without transfection of miR-181a-5p. The relative AKT3 protein levels are presented as a percentage of CTL.  $**P < 0.01$  vs. miR-NC. (B) OMM2.5 cells were transfected with siR-AKT3 or AKT3 overexpression plasmid for 48 h, and AKT3 protein levels were detected. The relative cell proliferation (C) apoptosis (D) of siR-Akt3 transfected OMM2.5 cells are presented.  $**P < 0.01$  vs. siR-NC. After co-transfected with miR-181a and indicated overexpression plasmids, cell proliferation (E) and cell apoptosis (F) of OMM2.5 cells were determined and relative values are presented.  $**P < 0.01$  vs. miR-181a-5p+pcDNA3.1.
